# Supplementary material for: Interleukin-34 as a fibroblast-derived marker of liver fibrosis in patients with non-alcoholic fatty liver disease
Source: PubMed Central journal article supplement (PMC4929441; doi:10.1038/srep28814), 2016-07-01

## Supplementary information

### **Interleukin-34 as a fibroblast-derived marker of liver fibrosis in patients with non-alcoholic fatty liver disease**

Hiroataka Shoji<sup>1,2</sup>, Sachiyo Yoshio<sup>1</sup>, Yohei Mano<sup>1</sup>, Erina Kumagai<sup>1</sup>, Masaya Sugiyama<sup>1</sup>, Masaaki Korenaga<sup>1</sup>, Taeang Arai<sup>3</sup>, Norio Itokawa<sup>3</sup>, Masanori Atsukawa<sup>3</sup>, Hiroshi Aikata<sup>4</sup>, Hideyuki Hyogo<sup>4,5</sup>, Kazuaki Chayama<sup>4</sup>, Tomohiko Ohashi<sup>6</sup>, Kiyooki Ito<sup>6</sup>, Masashi Yoneda<sup>6</sup>, Yuichi Nozaki<sup>7</sup>, Takumi Kawaguchi<sup>8</sup>, Takuji Torimura<sup>8</sup>, Masanori Abe<sup>9</sup>, Yoichi Hiasa<sup>9</sup>, Toshiya Kamiyama<sup>2</sup>, Akinobu Taketomi<sup>2</sup>, Masashi Mizokami<sup>1</sup> and Tatsuya Kanto<sup>1\*</sup>

1 The Research Center for Hepatitis and Immunology, National Center for Global Health and Medicine, Ichikawa, Chiba, Japan

2 Department of Gastroenterological Surgery I, Hokkaido University Graduate School of Medicine, Sapporo, Hokkaido, Japan

3 Division of Gastroenterology, Department of Internal Medicine, Nippon Medical School Chiba Hokusoh Hospital, Inzai, Chiba, Japan

4 Department of Gastroenterology and Metabolism, Applied Life Sciences, Institute of Biomedical & Health Sciences, Hiroshima University, Hiroshima, Hiroshima, Japan

5 Department of Gastroenterology and Hepatology, JA Hiroshima General Hospital, Hatsukaichi, Hiroshima, Japan

6 Division of Gastroenterology, Department of Internal Medicine, Aichi Medical University School of Medicine, Nagakute, Aichi, Japan

7 Department of Gastroenterology, National Center for Global Health and Medicine, Shinjuku, Tokyo, Japan

8 Division of Gastroenterology, Department of Medicine, Kurume University School of Medicine, Kurume, Fukuoka, Japan

9 Department of Gastroenterology and Metabology, Ehime University Graduate School of Medicine, Toon, Ehime, Japan

**Corresponding author:** Tatsuya Kanto, M.D., Ph.D.

The Research Center for Hepatitis and Immunology, National Center for Global Health and Medicine, 1-7-1, Kohnodai, Ichikawa 272-8516, Japan.

E-mail: [kantot@hospk.ncgm.go.jp](mailto:kantot@hospk.ncgm.go.jp)

Telephone: +81-47-372-3501, Fax: +81-47-375-4766

**Supplementary Table S1. List of Cytokines/Chemokines for Multiplexed Analyses**

|                    |                      |              |                                  |
|--------------------|----------------------|--------------|----------------------------------|
| 6Ckine/CCL21       | Gro- $\alpha$ /CXCL1 | IL-6         | MIP-1 $\alpha$ /CCL3             |
| BCA-1/CXCL13       | Gro- $\beta$ /CXCL2  | IL-8/CXCL8   | MIP-1 $\delta$ /CCL15            |
| CTACK/CCL27        | I-309/CCL1           | IP-10/CXCL10 | MIP-3 $\alpha$ /CCL20            |
| ENA-78/CXCL5       | I-TAC/CXCL11         | MCP-1/CCL2   | MIP-3 $\beta$ /CCL19             |
| Eotaxin-2/CCL24    | IFN- $\gamma$        | MCP-2/CCL8   | MPIF-1/CCL23                     |
| Eotaxin-3/CCL26    | IL-10                | MCP-3/CCL7   | SCYB16/CXCL16                    |
| Eotaxin/CCL11      | IL-16                | MCP-4/CCL13  | SDF-1 $\alpha$ + $\beta$ /CXCL12 |
| Fractalkine/CX3CL1 | IL-1 $\beta$         | MDC/CCL22    | TARC/CCL17                       |
| GCP-2/CXCL6        | IL-2                 | MIF          | TECK/CCL25                       |
| GM-CSF             | IL-4                 | MIG/CXCL9    | TNF- $\alpha$                    |

**Supplementary Table S2. Variable Parameters Associated With Significant Fibrosis ( $\geq$ Stage 2) According to Univariate and Multivariate Analyses**

|                          | Significant Fibrosis ( $\geq$ Stage 2) |             |                  |       |             |                  |
|--------------------------|----------------------------------------|-------------|------------------|-------|-------------|------------------|
|                          | UVA                                    |             |                  | MVA   |             |                  |
|                          | OR                                     | 95% CI      | p value          | OR    | 95% CI      | p value          |
| Female: 0, Male: 1       | 0.393                                  | 0.219-0.705 | <b>0.002</b>     | 2.041 | 0.792-5.264 | 0.140            |
| Age                      | 1.054                                  | 1.031-1.078 | <b>&lt;0.001</b> | 1.054 | 1.018-1.091 | <b>0.003</b>     |
| BMI (kg/m <sup>2</sup> ) | 1.024                                  | 0.963-1.089 | 0.440            |       |             |                  |
| Platelet                 | 0.970                                  | 0.928-1.013 | 0.171            | 1.089 | 1.002-1.184 | <b>0.046</b>     |
| PT (%)                   | 0.945                                  | 0.924-0.968 | <b>&lt;0.001</b> | 0.972 | 0.944-1.002 | 0.068            |
| Total bilirubin          | 1.046                                  | 0.658-1.664 | 0.848            |       |             |                  |
| AST                      | 1.020                                  | 1.009-1.031 | <b>&lt;0.001</b> | 1.011 | 0.996-1.026 | 0.163            |
| ALT                      | 1.002                                  | 0.997-1.007 | 0.421            |       |             |                  |
| Cholesterol              | 0.996                                  | 0.990-1.003 | 0.237            |       |             |                  |
| Albumin                  | 0.471                                  | 0.227-0.977 | <b>0.043</b>     | 1.305 | 0.444-3.836 | 0.629            |
| Hyaluronic acid          | 1.017                                  | 1.010-1.025 | <b>&lt;0.001</b> | 1.004 | 0.998-1.011 | 0.205            |
| Type IV collagen 7S      | 2.996                                  | 2.135-4.204 | <b>&lt;0.001</b> | 2.259 | 1.447-3.528 | <b>&lt;0.001</b> |
| IL-34                    | 1.221                                  | 1.096-1.360 | <b>&lt;0.001</b> | 0.978 | 0.849-1.128 | 0.763            |
| M-CSF                    | 1.002                                  | 1.001-1.003 | <b>&lt;0.001</b> | 1.001 | 0.999-1.002 | 0.152            |
| sCD163                   | 1.002                                  | 1.001-1.003 | <b>&lt;0.001</b> | 1.000 | 0.999-1.002 | 0.735            |
| MIP-3 $\alpha$ /CCL20    | 1.006                                  | 0.993-1.019 | 0.380            |       |             |                  |
| APRI                     | 3.570                                  | 1.931-6.601 | <b>&lt;0.001</b> |       |             |                  |
| FIB-4 index              | 2.060                                  | 1.535-2.765 | <b>&lt;0.001</b> |       |             |                  |
| NFS                      | 1.853                                  | 1.483-2.314 | <b>&lt;0.001</b> |       |             |                  |

UVA, univariate analysis; MVA, multivariate analysis; OR, odds ratio; CI, confidence interval

IL-34, M-CSF, sCD163, MIP-3 $\alpha$ /CCL20 see Table 2.

BMI, PT, AST, ALT, APRI, NFS see Table 1.

**Supplementary Table S3. Variable Parameters Associated with Advanced Fibrosis (≥Stage 3) According to Univariate and Multivariate Analyses**

|                          | Advanced Fibrosis (≥Stage 3) |             |                  |       |             |                  |
|--------------------------|------------------------------|-------------|------------------|-------|-------------|------------------|
|                          | UVA                          |             |                  | MVA   |             |                  |
|                          | OR                           | 95% CI      | p value          | OR    | 95% CI      | p value          |
| Female: 0, Male: 1       | 0.436                        | 0.237-0.800 | <b>0.007</b>     | 1.301 | 0.500–3.38  | 0.589            |
| Age                      | 1.059                        | 1.033-1.086 | <b>&lt;0.001</b> | 1.040 | 1.002-1.079 | <b>0.037</b>     |
| BMI (kg/m <sup>2</sup> ) | 1.024                        | 0.963-1.089 | 0.443            |       |             |                  |
| Platelet                 | 0.914                        | 0.870-0.961 | <b>&lt;0.001</b> | 0.982 | 0.910-1.058 | 0.628            |
| PT (%)                   | 0.932                        | 0.908-0.958 | <b>&lt;0.001</b> | 0.974 | 0.942-1.007 | 0.125            |
| Total bilirubin          | 0.962                        | 0.598-1.547 | 0.872            |       |             |                  |
| AST                      | 1.011                        | 1.002-1.019 | <b>0.012</b>     | 1.006 | 0.993-1.019 | 0.403            |
| ALT                      | 0.999                        | 0.994-1.004 | 0.632            |       |             |                  |
| Cholesterol              | 0.992                        | 0.985-0.999 | <b>0.029</b>     | 0.999 | 0.990-1.010 | 0.988            |
| Albumin                  | 0.280                        | 0.129-0.608 | <b>0.001</b>     | 0.776 | 0.260-2.314 | 0.648            |
| Hyaluronic acid          | 1.012                        | 1.007-1.017 | <b>&lt;0.001</b> | 1.001 | 0.995-1.007 | 0.720            |
| Type IV collagen 7S      | 2.496                        | 1.928-3.231 | <b>&lt;0.001</b> | 1.940 | 1.331-2.827 | <b>&lt;0.001</b> |
| IL-34                    | 1.335                        | 1.193-1.494 | <b>&lt;0.001</b> | 1.125 | 0.981-1.289 | 0.092            |
| M-CSF                    | 1.001                        | 1.000-1.002 | <b>0.003</b>     | 1.001 | 0.999-1.001 | 0.290            |
| sCD163                   | 1.001                        | 1.001-1.002 | <b>0.001</b>     | 0.999 | 0.998-1.001 | 0.370            |
| MIP-3 $\alpha$ /CCL20    | 1.006                        | 0.995-1.017 | 0.278            |       |             |                  |
| APRI                     | 3.294                        | 1.963-5.528 | <b>&lt;0.001</b> |       |             |                  |
| FIB-4 index              | 2.232                        | 1.705-2.921 | <b>&lt;0.001</b> |       |             |                  |
| NFS                      | 2.181                        | 1.691-2.813 | <b>&lt;0.001</b> |       |             |                  |

UVA, MVA, OR, CI see Supplementary Table S2

IL-34, M-CSF, sCD163, MIP-3 $\alpha$ /CCL20 see Table 2.

BMI, PT, AST, ALT, APRI, NFS see Table 1.

**Supplementary Table S4. Clinical Backgrounds of Subjects with HCV Infection**

|                                               | Stage 0-2 (n = 31)<br>(n = 31) | Stage 3-4 (n = 7)<br>(n = 7) | All (n = 38)<br>(n = 38) |
|-----------------------------------------------|--------------------------------|------------------------------|--------------------------|
| Male/female                                   | 16/15                          | 1/6                          | 17/21                    |
| Age (year)                                    | 57 (27-76)                     | 71(54-88)                    | 61 (27-88)               |
| BMI (kg/m <sup>2</sup> )                      | 22.4 (17.0-30.9)               | 25.2 (15.9-27.7)             | 22.8 (15.9-30.9)         |
| Platelet (×10 <sup>4</sup> /mm <sup>3</sup> ) | 17.2 (8.3-34.1)                | 8.8 (5.2-13.5)               | 16.4 (5.2-34.1)          |
| PT (%)                                        | 97 (76-129)                    | 85 (63-95)                   | 95 (63-129)              |
| Total bilirubin (mg/dL)                       | 0.6 (0.4-1.3)                  | 0.8 (0.6-1.5)                | 0.7 (0.4-1.5)            |
| AST (IU/L)                                    | 32 (17-253)                    | 71 (37-206)                  | 43 (17-253)              |
| ALT (IU/L)                                    | 41 (17-362)                    | 56 (31-294)                  | 43 (17-362)              |
| Cholesterol (mg/dL)                           | 169 (120-251)                  | 144 (133-187)                | 167 (120-251)            |
| Albumin (g/dL)                                | 4.3 (2.9-4.9)                  | 3.7 (3.3-4.4)                | 4.2 (2.9-4.9)            |
| APRI                                          | 0.66 (0.18-2.83)               | 2.44 (1.38-5.38)             | 0.81 (0.18-5.38)         |
| FIB-4 index                                   | 1.96 (0.55-6.42)               | 6.69 (4.20-9.80)             | 2.3 (0.55-9.80)          |

The values are expressed as median (range). BMI, PT, AST, ALT, APRI see Table 1.

**Supplementary Table S5. Comparison of Performance of Biomarkers and Fibrosis Scores as a Diagnostic of Liver Fibrosis in Patients with HCV Infection in  $\geq$ Stage 3**

| Severe Fibrosis<br>( $\geq$ Stage 3) | IL-34 | M-CSF | sCD163 | APRI | FIB-4 index |
|--------------------------------------|-------|-------|--------|------|-------------|
| AUC                                  | 0.95  | 0.75  | 0.85   | 0.93 | 0.98        |
| Cutoff value                         | 6.59  | 779   | 1148   | 1.38 | 4.20        |
| Sensitivity (%)                      | 100   | 71.4  | 85.7   | 100  | 100         |
| Specificity (%)                      | 83.9  | 74.2  | 74.2   | 80.6 | 90.3        |
| PPV (%)                              | 58.3  | 38.5  | 42.9   | 53.8 | 70.0        |
| NPV (%)                              | 100   | 92.0  | 95.8   | 100  | 100         |
| Predictive accuracy (%)              | 86.9  | 73.7  | 76.3   | 84.2 | 92.1        |

The cutoff values, sensitivity, and specificity were determined as described in Table 3.

AUC, PPV, NPV, IL-34, M-CSF, sCD163, APRI, see Table 3.

## Supplementary Figure legend

### Supplementary Figure S1: Serum IL-34 and other markers in patients with HCV infection.

Serum interleukin-34 (IL-34), other biomarkers and the fibrosis scores are shown for healthy volunteers and patients with hepatitis C virus (HCV) infection categorized by the stage of fibrosis (0-2 and 3-4 by METAVIR classification) (**A-E**). IL-34 (**A**), macrophage-colony stimulating factor (M-CSF) (**B**), soluble CD163 (sCD163) (**C**), aspartate transaminase (AST)-to-platelet ratio index (APRI) (**D**), and FIB-4 index (**E**). Receiver-operating characteristic (ROC) curves of IL-34, M-CSF, sCD163, APRI and, FIB-4 index as a diagnostic marker of advanced liver fibrosis ( $\geq$ Stage 3) are shown (**F-G**). ROC curves were shown as follows: (**F**) IL-34, M-CSF, and sCD163, (**G**) IL-34, APRI, and FIB-4 index.

Box plots are as described in Figure 1.

\*\*  $p < 0.01$ , \*\*\*\*  $p < 0.0001$  by Mann-Whitney U-test or Kruskal-Wallis test with Dunn's multiple comparison test

HV, healthy volunteer; 0-2, Stage 0-2 (Brunt's criteria); 3-4, Stage 3-4.



**Supplementary Figure S2: Immunofluorescence staining of IL-34 and CD68 on liver specimens obtained from the patient with NAFLD.**

Immunofluorescence staining on frozen liver specimens from the patient with NAFLD was shown (x200, green, IL-34; red, CD68; blue, DAPI).

**Supplementary Figure S3: The expression of IL-34 in primary fibroblasts obtained from patients with NAFLD.**

Primary fibroblasts obtained from the cirrhotic patient with non-alcoholic fatty liver disease (NAFLD) [#3 NAFLD-liver cirrhosis (LC)] were labeled with anti-human interleukin-34 (IL-34) monoclonal and secondary antibody (Ab) (**A, left**) and with only secondary Ab (**A, right**). Immunofluorescence staining on primary fibroblast was shown (**B**) (x400, green, IL-34; red,  $\alpha$ -SMA; blue, DAPI). Primary fibroblasts were isolated from three surgically resected liver specimens of NAFLD patients with chronic hepatitis [#1 NAFLD-chronic hepatitis (CH)] and liver cirrhosis (#2 and #3 NAFLD-LC). Huh7 (hepatocellular carcinoma cell line), LX-2 (hepatic stellate cell line) and primary fibroblast cells ( $3 \times 10^4$  cells/ml/well in 24-well plates) were cultured in fetal bovine serum (FBS)-free culture medium for 24 hours (starvation). After starvation, the cells were incubated for 24 hours and the cells and supernatant were

harvested. The expression levels of IL-34 mRNA were examined by quantitative reverse-transcriptase polymerase chain reaction (qRT-PCR) (C). The levels of IL-34 in the culture supernatant were quantified by enzyme-linked immunosorbent assay (ELISA) (D). Huh7, LX-2, and primary fibroblasts were cultured with or without recombinant tumor necrosis factor alpha (TNF- $\alpha$ ) (10 ng/ml) for 24 h. The levels of IL-34 mRNA were examined by qRT-PCR (E).

rhTNF- $\alpha$ , recombinant TNF- $\alpha$ ; n.d.,not detected

\*\* p<0.01, \*\*\* p<0.001, \*\*\*\* p<0.0001 by Kruskal-Wallis test with Dunn's multiple comparison test

**Supplementary Figure S4: Immunostaining of IL-34 in cirrhotic liver tissue obtained from the patients with HCV infection.**

Noncancerous liver specimen was obtained from patients with HCV infection (liver cirrhosis/ Stage 4). Liver specimen was labeled with mouse anti-human IL-34 monoclonal and secondary goat anti-mouse antibody.

## Supplementary Figure S1

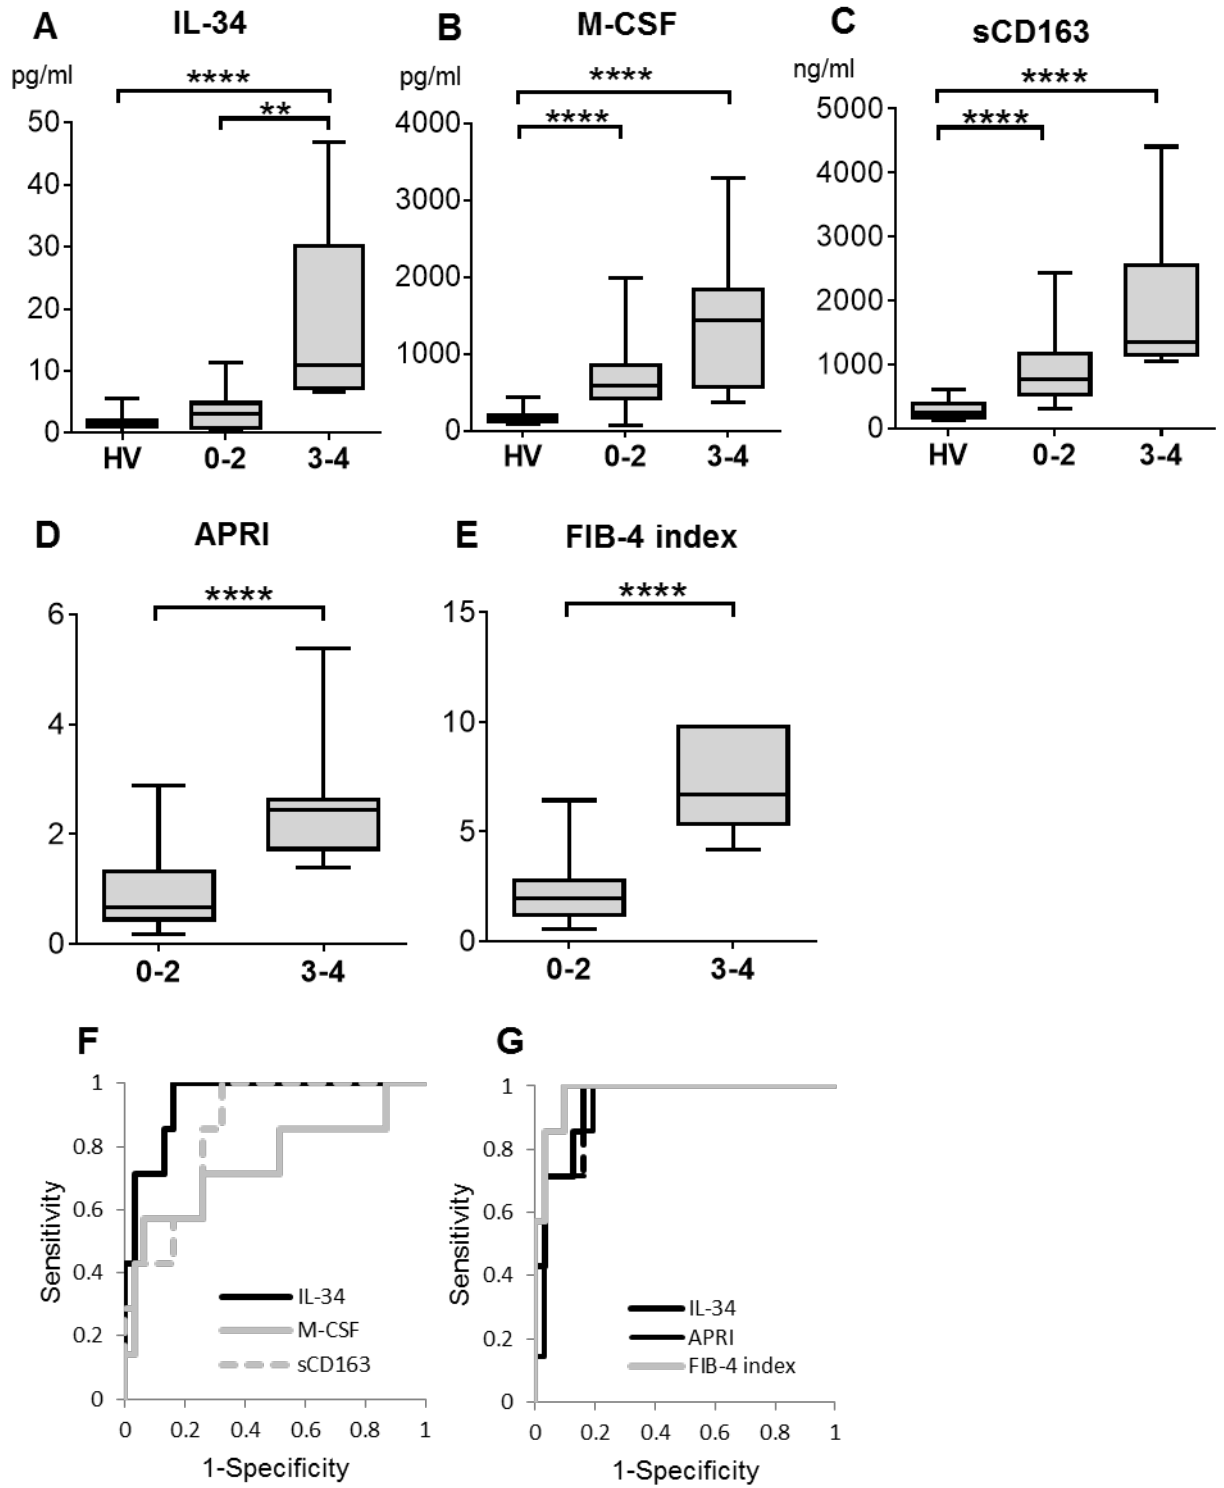

Supplementary Figure S2

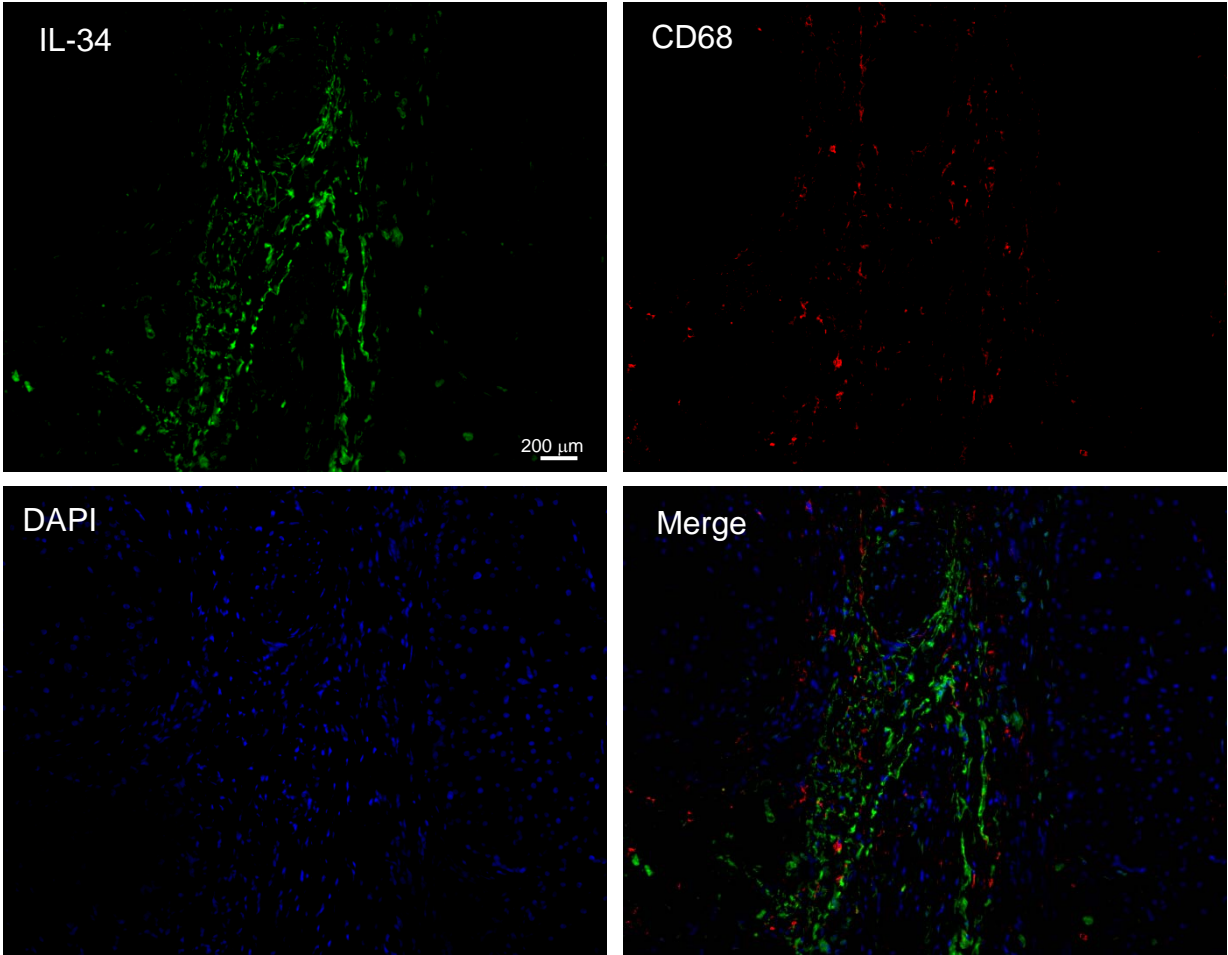

### Supplementary Figure S3

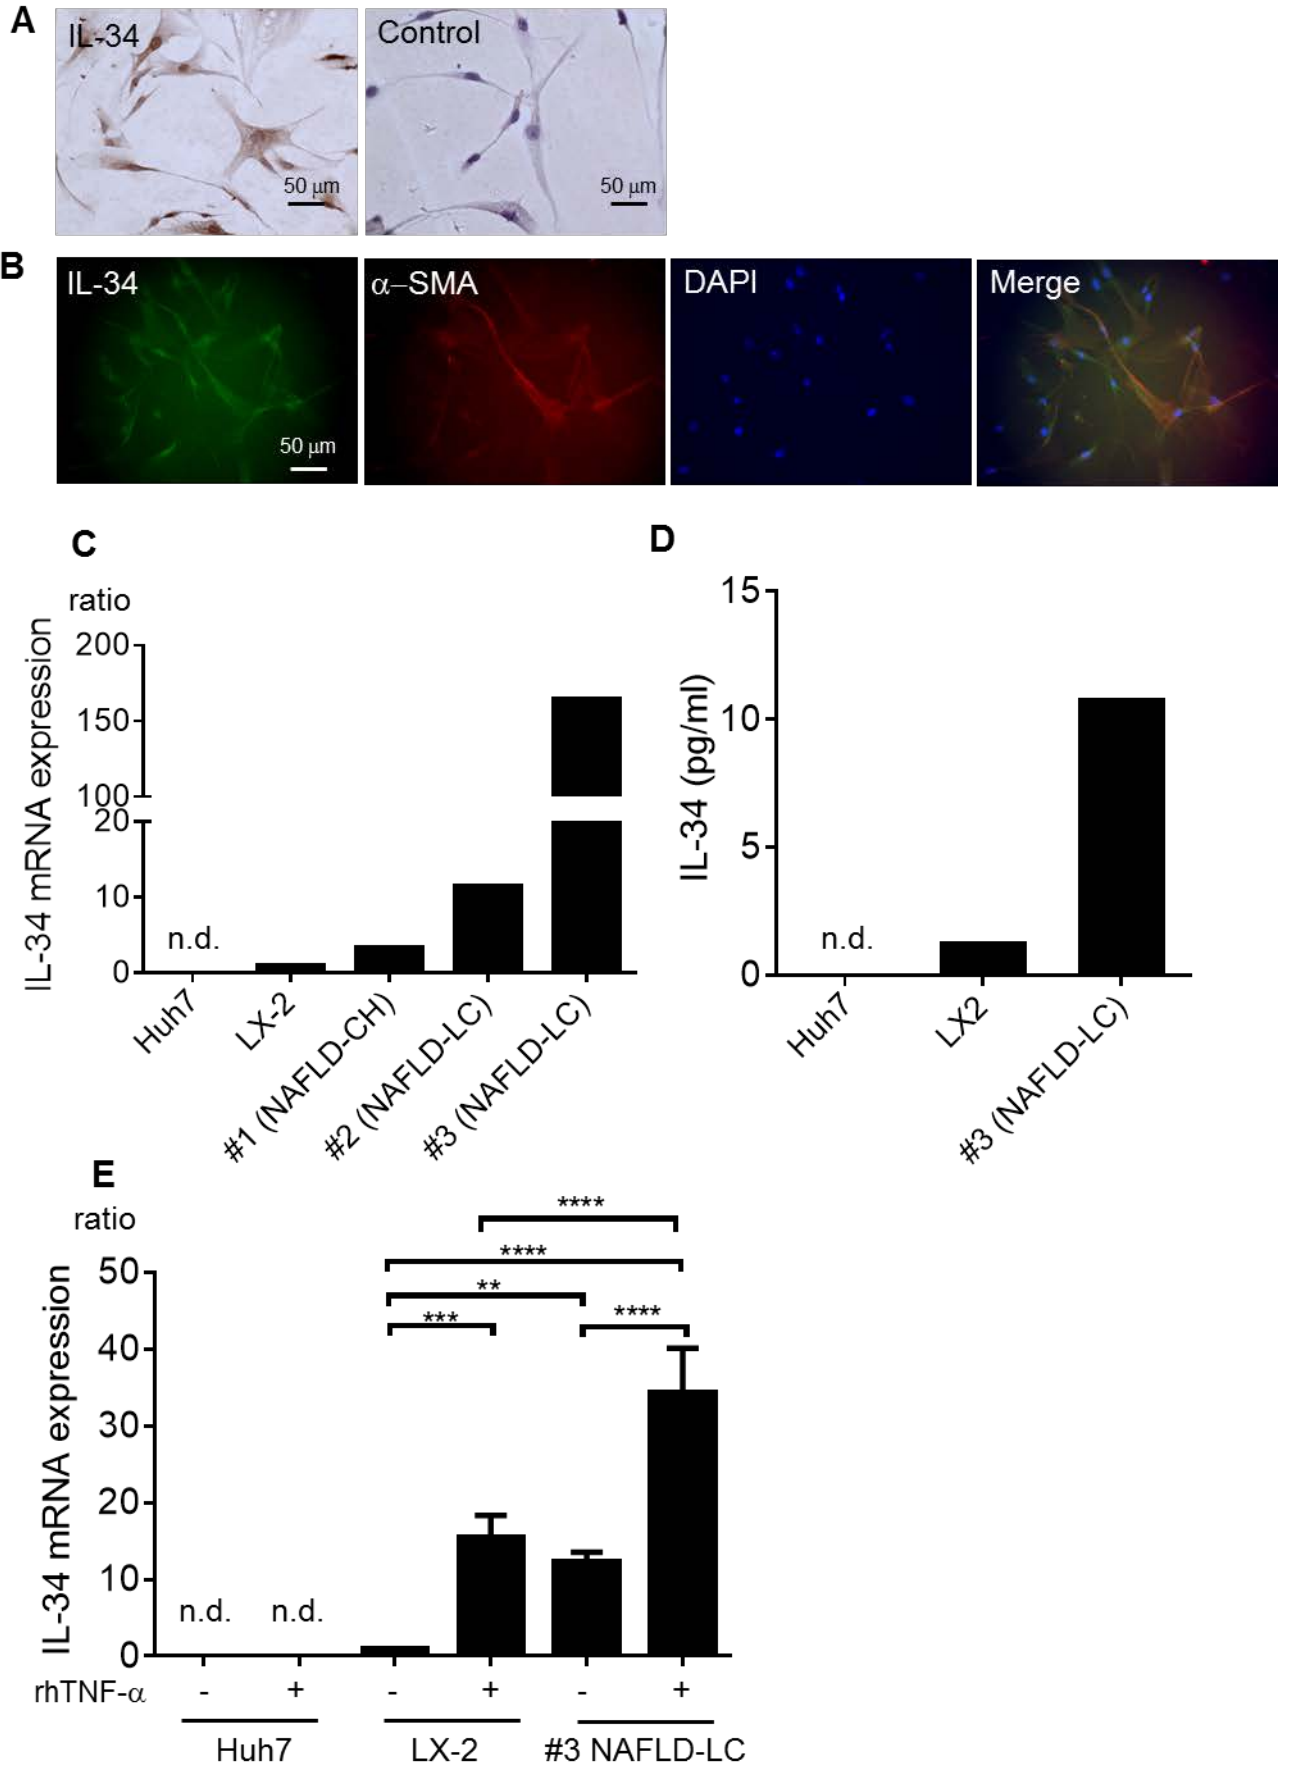

## Supplementary Figure S4

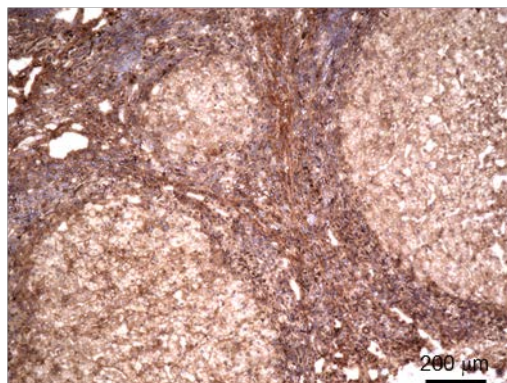

Supplement: srep28814-s1.pdf [file srep28814-s1.pdf]
